# Supplementary material for: GamblingLess: A Randomised Trial Comparing Guided and Unguided Internet-Based Gambling Interventions
Source: MDPI journal article supplement (doi:10.3390/jcm10112224), 2021-05-21
Supplement: s1 [file s1]

## Supplementary Material

**Table S1.** Baseline sample gambling behaviour characteristics

| Gambling behaviour characteristic                            | Pure self-directed<br>(n = 105) | Guided self-directed<br>(n = 101) | Total<br>(n = 206) |
|--------------------------------------------------------------|---------------------------------|-----------------------------------|--------------------|
| Problematic gambling activities (n, %) <sup>a</sup>          |                                 |                                   |                    |
| EGMs                                                         | 77 (73.3)                       | 76 (75.3)                         | 153 (74.3)         |
| Casino table games (e.g., blackjack)                         | 15 (14.3)                       | 18 (17.8)                         | 33 (16.0)          |
| Horse, harness or greyhound racing                           | 54 (51.4)                       | 39 (38.6)                         | 93 (45.2)          |
| Sports and events betting                                    | 33 (31.4)                       | 23 (22.8)                         | 56 (27.2)          |
| Number games (e.g., lotteries, keno, bingo)                  | 12 (11.4)                       | 13 (12.9)                         | 25 (12.1)          |
| Informal private games                                       | 5 (4.8)                         | 4 (4.0)                           | 9 (4.4)            |
| PGSI problem gambling severity category (n, %) <sup>b</sup>  |                                 |                                   |                    |
| Problem gambling                                             | 102 (97.1)                      | 96 (95.0)                         | 198 (96.1)         |
| Moderate risk gambling                                       | 2 (1.9)                         | 5 (5.0)                           | 7 (3.4)            |
| Low risk gambling                                            | 0 (0.0)                         | 0 (0.0)                           | 0 (0.0)            |
| Non-problem gambling                                         | 1 (1.0)                         | 0 (0.0)                           | 1 (0.5)            |
| G-SAS gambling symptom severity category (n, %) <sup>b</sup> |                                 |                                   |                    |
| Extreme                                                      | 7 (6.7)                         | 7 (6.9)                           | 14 (6.8)           |
| Severe                                                       | 44 (41.9)                       | 28 (27.7)                         | 72 (35.0)          |
| Moderate                                                     | 45 (42.9)                       | 56 (55.5)                         | 101 (49.0)         |
| Mild                                                         | 7 (6.7)                         | 9 (8.9)                           | 16 (7.8)           |
| Gambling frequency (days) (M, SD) <sup>c</sup>               |                                 |                                   |                    |
| EGMs                                                         | 5.3 (6.5)                       | 6.6 (7.3)                         | 6.0 (6.9)          |
| Casino table games (e.g., blackjack)                         | 0.1 (0.7)                       | 0.4 (2.6)                         | 0.3 (1.9)          |
| Horse, harness or greyhound racing                           | 4.4 (7.6)                       | 3.5 (7.1)                         | 3.9 (7.3)          |
| Sports and events betting                                    | 1.3 (4.1)                       | 2.3 (6.5)                         | 1.8 (5.4)          |
| Number games (e.g., lotteries, keno, bingo)                  | 1.3 (3.9)                       | 2.0 (5.7)                         | 1.6 (4.9)          |
| Informal private games                                       | 0.0 (0.1)                       | 0.3 (2.5)                         | 0.2 (1.8)          |
| Total gambling frequency                                     | 11.9 (11.5)                     | 14.7 (16.9)                       | 13.3 (14.5)        |
| Gambling expenditure (AUD\$) (M, SD) <sup>c</sup>            |                                 |                                   |                    |
| EGMs                                                         | 1742 (4340)                     | 1798 (3440)                       | 1769 (3916)        |
| Casino table games (e.g., blackjack)                         | 46 (249)                        | 30 (151)                          | 38 (207)           |
| Horse, harness or greyhound racing                           | 967 (3240)                      | 459 (1026)                        | 718 (2430)         |
| Sports and events betting                                    | 328 (2458)                      | 391 (2994)                        | 359 (2728)         |
| Number games (e.g., lotteries, keno, bingo)                  | 56 (230)                        | 51 (230)                          | 54 (229)           |
| Informal private games                                       | 0 (0)                           | 4 (40)                            | 2 (28)             |
| Total gambling expenditure                                   | 1953(4359)                      | 1315 (3459)                       | 1640 (3947)        |

<sup>a</sup> Participants could endorse more than one option

<sup>b</sup> PGSI: Problem Gambling Severity Index; G-SAS: Gambling Symptom Assessment Scale

<sup>c</sup> Based on previous 30 days

**Table S2.** Baseline sample psychological characteristics

| Psychological characteristic                           | Pure self-directed<br>(n = 105) | Guided self-directed<br>(n = 101) | Total<br>(n = 206) |
|--------------------------------------------------------|---------------------------------|-----------------------------------|--------------------|
| K6 psychological distress category (n, %) <sup>a</sup> |                                 |                                   |                    |
| Very high risk                                         | 7 (6.7)                         | 12 (11.9)                         | 19 (9.2)           |
| High risk                                              | 33 (31.4)                       | 24 (23.8)                         | 57 (27.7)          |
| Moderate risk                                          | 37 (35.2)                       | 35 (34.6)                         | 72 (34.9)          |
| Low risk                                               | 28 (26.7)                       | 30 (29.7)                         | 58 (28.2)          |
| EUROHIS quality of life (n, %) <sup>a, b</sup>         |                                 |                                   |                    |
| Very poor                                              | 6 (5.7)                         | 6 (5.9)                           | 12 (5.8)           |
| Poor                                                   | 17 (16.2)                       | 12 (11.9)                         | 29 (14.1)          |
| Neither good nor poor                                  | 30 (28.6)                       | 32 (31.7)                         | 62 (30.1)          |
| Good                                                   | 37 (35.2)                       | 46 (45.5)                         | 83 (40.3)          |
| Very good                                              | 15 (14.3)                       | 5 (5.0)                           | 20 (9.7)           |
| AUDIT-3 hazardous alcohol use (n, %) <sup>a</sup>      | 87 (82.9)                       | 79 (78.2)                         | 166 (80.6)         |
| Any substance use (n, %) <sup>c</sup>                  | 18 (17.1)                       | 19 (18.8)                         | 37 (18.0)          |
| Readiness rulers (M, SD)                               |                                 |                                   |                    |
| Importance                                             | 9.5 (1.2)                       | 9.6 (1.1)                         | 9.5 (1.2)          |
| Readiness                                              | 9.1 (1.6)                       | 9.2 (1.7)                         | 9.2 (1.6)          |
| Confidence                                             | 4.6 (2.5)                       | 5.0 (2.6)                         | 4.8 (2.5)          |
| BSCQ self-efficacy (M, SD) <sup>a</sup>                |                                 |                                   |                    |
| Unpleasant emotions                                    | 3.8 (2.8)                       | 4.4 (3.0)                         | 4.1 (2.9)          |
| Physical discomfort                                    | 5.4 (3.1)                       | 6.1 (3.0)                         | 5.8 (3.1)          |
| Pleasant emotions                                      | 5.6 (3.2)                       | 5.8 (3.0)                         | 5.7 (3.1)          |
| Testing control over gambling                          | 3.8 (2.9)                       | 4.7 (3.0)                         | 4.2 (2.9)          |
| Urges and temptations                                  | 3.4 (2.5)                       | 3.9 (2.7)                         | 3.6 (2.6)          |
| Conflict with others                                   | 4.5 (3.2)                       | 4.9 (3.1)                         | 4.7 (3.2)          |
| Social pressures to gamble                             | 4.4 (3.4)                       | 4.0 (3.1)                         | 4.2 (3.3)          |
| Having pleasant times with others                      | 5.6 (3.1)                       | 5.3 (3.3)                         | 5.4 (3.2)          |
| Financial pressures <sup>d</sup>                       | 4.0 (3.2)                       | 4.3 (3.4)                         | 4.1 (3.3)          |
| Alcohol or drugs <sup>d</sup>                          | 4.6 (3.6)                       | 5.2 (3.9)                         | 4.9 (3.8)          |

<sup>a</sup> K6: Kessler 6 Psychological Distress Scale; EUROHIS (first item); AUDIT-3: Alcohol Use Disorders Identification Test-3; BSCQ: Brief Situational Confidence Questionnaire (adapted to gambling)

<sup>b</sup> First item only

<sup>c</sup> Based on previous 30 days

<sup>d</sup> Additional items

**Table S3.** Baseline sample treatment characteristics

| Treatment characteristic                               | Pure self-directed<br>(n = 105) | Guided self-directed<br>(n = 101) | Total<br>(n = 206) |
|--------------------------------------------------------|---------------------------------|-----------------------------------|--------------------|
| Treatment goal (n, %)                                  |                                 |                                   |                    |
| Quit altogether                                        | 51 (48.6)                       | 49 (48.5)                         | 100 (48.5)         |
| Quit problem gambling activities                       | 25 (23.8)                       | 25 (24.8)                         | 50 (24.3)          |
| Cut back problem gambling activities                   | 29 (27.6)                       | 27 (26.7)                         | 56 (27.2)          |
| HSQ high-intensity help-seeking (n, %) <sup>a, b</sup> |                                 |                                   |                    |
| Gambling counsellor face-to-face                       | 8 (7.6)                         | 4 (4.0)                           | 12 (5.8)           |
| Financial counselling                                  | 3 (2.9)                         | 3 (3.0)                           | 15 (7.3)           |
| Residential facility                                   | 1 (1.0)                         | 2 (2.0)                           | 3 (1.5)            |
| Gambling support group                                 | 3 (2.9)                         | 6 (5.9)                           | 9 (4.4)            |
| Psychologist/psychiatrist/GP                           | 8 (7.6)                         | 7 (6.9)                           | 15 (7.3)           |
| Any high-intensity intervention                        | 15 (14.3)                       | 17 (16.8)                         | 32 (15.5)          |
| HSQ low-intensity help-seeking (n, %) <sup>a, b</sup>  |                                 |                                   |                    |
| Gambling helpline                                      | 8 (7.6)                         | 6 (5.9)                           | 14 (6.8)           |
| Gambling counsellor online                             | 4 (3.8)                         | 6 (5.9)                           | 10 (4.9)           |
| Gambling counsellor via email                          | 2 (1.9)                         | 1 (1.0)                           | 3 (1.5)            |
| Any low-intensity intervention                         | 12 (11.4)                       | 10 (9.9)                          | 22 (10.7)          |
| HSQ self-directed actions (n, %) <sup>a, b</sup>       |                                 |                                   |                    |
| Online gambling forums                                 | 12 (11.4)                       | 10 (9.9)                          | 22 (10.7)          |
| Family/friends                                         | 32 (30.5)                       | 18 (17.8)                         | 50 (24.3)          |
| Self-help                                              | 20 (19.6)                       | 28 (28.0)                         | 48 (23.8)          |
| Read information on Gambling Help                      | 22 (21.0)                       | 24 (23.8)                         | 46 (22.3)          |
| Online website                                         |                                 |                                   |                    |
| Completed self-help module on website                  | 2 (1.9)                         | 6 (5.9)                           | 8 (3.9)            |
| Self-exclusion                                         | 11 (10.5)                       | 5 (5.0)                           | 16 (7.8)           |
| Any self-directed action                               | 53 (50.5)                       | 44 (43.6)                         | 97 (47.1)          |

<sup>a</sup> HSQ: Help-Seeking Questionnaire<sup>b</sup> Based on previous 30 days

**Table S4.** Baseline differences between PSD and GSD participants who completed the 8-week, 12-week or 24-month evaluation

| Socio-demographic characteristic  | Pure self-directed<br>(n = 38) | Guided self-directed<br>(n = 42) | p     |
|-----------------------------------|--------------------------------|----------------------------------|-------|
| Sex (n, %)                        |                                |                                  |       |
| Female                            | 17 (34.0)                      | 18 (35.3)                        | 0.891 |
| Male                              | 33 (66.0)                      | 33 (64.7)                        |       |
| Age group in years (n, %)         |                                |                                  |       |
| 18 – 24                           | 6 (12.0)                       | 9 (17.7)                         | 0.903 |
| 25 – 29                           | 8 (16.0)                       | 6 (11.8)                         |       |
| 30 – 34                           | 9 (18.0)                       | 7 (13.7)                         |       |
| 35 – 39                           | 9 (18.0)                       | 10 (19.6)                        |       |
| 40 – 44                           | 4 (8.0)                        | 4 (7.8)                          |       |
| 45 – 49                           | 2 (4.0)                        | 5 (9.8)                          |       |
| 50 – 54                           | 5 (10.0)                       | 5 (9.8)                          |       |
| 55+                               | 7 (14.0)                       | 5 (9.8)                          |       |
| Country of birth (n, %)           |                                |                                  |       |
| Australia                         | 42 (84.0)                      | 39 (76.5)                        | 0.342 |
| Other                             | 8 (16.0)                       | 12 (23.5)                        |       |
| Employment (n, %)                 |                                |                                  |       |
| Work full-time                    | 36 (72.0)                      | 37 (72.6)                        | 0.508 |
| Work part-time/casual             | 6 (12.0)                       | 9 (17.7)                         |       |
| Unemployed                        | 2 (4.0)                        | 1 (2.0)                          |       |
| Full time student                 | 1 (2.0)                        | 1 (2.0)                          |       |
| Full-time home duties             | 0 (0)                          | 1 (2.0)                          |       |
| Retired                           | 3 (6.0)                        | 0 (0)                            |       |
| Sick or disability pension        | 2 (4.0)                        | 1 (2.0)                          |       |
| Other                             | 0 (0.0)                        | 1 (2.0)                          |       |
| Annual personal net income (n, %) |                                |                                  |       |
| < \$25,000                        | 7 (14.0)                       | 5 (9.8)                          | 0.929 |
| \$25,000 - \$39,999               | 7 (14.0)                       | 9 (17.7)                         |       |
| \$40,000 - \$64,999               | 14 (28.0)                      | 17 (33.3)                        |       |
| \$65,000 - \$79,999               | 7 (14.0)                       | 8 (15.7)                         |       |
| \$80,000 - \$129,999              | 12 (24.0)                      | 9 (17.7)                         |       |
| \$130,000+                        | 3 (6.0)                        | 3 (5.9)                          |       |

**Table S5.** Patterns of missing data for G-SAS gambling symptom severity

| Frequency | Percent (%) | Cumulative | Pattern  |         |          |           |
|-----------|-------------|------------|----------|---------|----------|-----------|
|           |             |            | Baseline | 8 weeks | 12 weeks | 24 months |
| PSD       |             |            |          |         |          |           |
| 56        | 53.33       | 53.33      | X        |         |          |           |
| 11        | 10.48       | 63.81      | X        |         |          | X         |
| 8         | 7.62        | 71.43      | X        | X       |          |           |
| 7         | 6.67        | 78.10      | X        |         | X        |           |
| 7         | 6.67        | 84.76      | X        |         | X        | X         |
| 6         | 5.71        | 90.48      | X        | X       | X        |           |
| 6         | 5.71        | 96.19      | X        | X       | X        | X         |
| 4         | 3.81        | 100.00     | X        | X       |          | X         |
| GSD       |             |            |          |         |          |           |
| 50        | 49.50       | 49.50      | X        |         |          |           |
| 14        | 13.86       | 63.37      | X        | X       | X        | X         |
| 9         | 8.91        | 72.28      | X        |         |          | X         |
| 9         | 8.91        | 81.19      | X        |         | X        |           |
| 8         | 7.92        | 89.11      | X        | X       |          |           |
| 5         | 4.95        | 94.06      | X        | X       |          | X         |
| 4         | 3.96        | 98.02      | X        | X       | X        |           |
| 2         | 1.98        | 100.00     | X        |         | X        | X         |

'X' denotes an observed G-SAS gambling symptom severity score

**Table S6.** Intention-to-treat between-group comparison of PSD and GSD conditions on primary and secondary outcomes <sup>a</sup>

| Outcome                                      | Unadjusted estimate (SE) |              |              |              | Estimated between-group difference (95% CI) | p     |
|----------------------------------------------|--------------------------|--------------|--------------|--------------|---------------------------------------------|-------|
|                                              | Baseline                 | 8-weeks      | 12-weeks     | 24-months    |                                             |       |
| G-SAS gambling symptom severity <sup>b</sup> | -                        | -0.33 (0.19) | -0.49 (0.29) | -3.94 (2.33) | -0.16 (-0.35, 0.03) <sup>c</sup>            | 0.091 |
| G-SAS gambling urges <sup>b</sup>            | -                        | -0.19 (0.07) | -0.28 (0.11) | -2.22 (0.85) | -0.09 (-0.16, -0.02) <sup>c</sup>           | 0.009 |
| Gambling frequency                           | -                        | -            | -            | -            | 0.95 (0.91, 1.00) <sup>d</sup>              | 0.043 |
| Gambling expenditure                         | -                        | -            | -            | -            | 0.99 (0.94, 1.04) <sup>d</sup>              | 0.728 |
| K6 psychological distress <sup>b</sup>       | -                        | -0.05 (0.10) | -0.08 (0.15) | -0.62 (1.18) | -0.03 (-0.12, 0.07) <sup>c</sup>            | 0.599 |
| EUROHIS quality of life <sup>b</sup>         | -                        | 0.02 (0.02)  | 0.03 (0.03)  | 0.26 (0.21)  | 0.01 (-0.01, 0.03) <sup>c</sup>             | 0.216 |
| HSQ high-intensity help-seeking <sup>b</sup> | -                        | -            | -            | -            | 0.98 (0.90, 1.05) <sup>e</sup>              | 0.516 |
| HSQ low-intensity help-seeking <sup>b</sup>  | -                        | -            | -            | -            | 0.94 (0.85, 1.04) <sup>e</sup>              | 0.263 |

<sup>a</sup> Adjusted for participant age and gender

<sup>b</sup> G-SAS: Gambling Symptom Assessment Scale; K6: Kessler 6 Psychological Distress Scale; EUROHIS (first item); HSQ: Help-Seeking Questionnaire

<sup>c</sup> Linear mixed regression models

<sup>d</sup> Mixed effects ordered logistic regression models - estimates reported as ORs (reference category = PSD)

<sup>e</sup> Mixed effects logistic regression models - estimates reported as ORs (reference category = PSD)

**Table S7.** Intention-to-treat within-group change for PSD and GSD conditions in primary and secondary outcomes <sup>a</sup>

| Outcome                                      | Treatment | Unadjusted estimate (SE) |              |              |              | Estimated within-group            | p      |
|----------------------------------------------|-----------|--------------------------|--------------|--------------|--------------|-----------------------------------|--------|
|                                              | group     | Baseline                 | 8-weeks      | 12-weeks     | 24-months    | difference (95% CI)               |        |
| G-SAS gambling symptom severity <sup>b</sup> | PSD       | 30.28 (0.89)             | 21.81 (1.10) | 18.09 (1.45) | 18.74 (1.79) | -4.58 (-5.71, -3.44) <sup>c</sup> | <0.001 |
|                                              | GSD       | 28.82 (0.87)             | 19.70 (1.00) | 15.67 (1.32) | 14.19 (1.65) | -4.92 (-6.00, -3.85) <sup>c</sup> | <0.001 |
| G-SAS gambling urges <sup>b</sup>            | PSD       | 10.30 (0.33)             | 7.68 (0.41)  | 6.53 (0.54)  | 6.67 (0.62)  | -1.41 (-1.83, -1.00) <sup>c</sup> | <0.001 |
|                                              | GSD       | 9.73 (0.31)              | 6.92 (0.36)  | 5.68 (0.48)  | 4.17 (0.63)  | -1.51 (-1.90, -1.12) <sup>c</sup> | <0.001 |
| Gambling frequency                           | PSD       | -                        | -            | -            | -            | 0.67 (0.50, 0.90) <sup>d</sup>    | 0.007  |
|                                              | GSD       | -                        | -            | -            | -            | 0.38 (0.27, 0.54) <sup>d</sup>    | <0.001 |
| Gambling expenditure                         | PSD       | -                        | -            | -            | -            | 0.39 (0.26, 0.59) <sup>d</sup>    | <0.001 |
|                                              | GSD       | -                        | -            | -            | -            | 0.41 (0.30, 0.56) <sup>d</sup>    | <0.001 |
| K6 psychological distress <sup>b</sup>       | PSD       | 17.01 (0.52)             | 14.68 (0.62) | 13.65 (0.78) | 12.68 (0.82) | -1.26 (-1.80, -0.71) <sup>c</sup> | <0.001 |
|                                              | GSD       | 17.24 (0.56)             | 13.91 (0.65) | 12.45 (0.84) | 12.14 (0.93) | -1.80 (-2.45, -1.15) <sup>c</sup> | <0.001 |
| EUROHIS quality of life <sup>b</sup>         | PSD       | 3.37 (0.10)              | 3.45 (0.12)  | 3.49 (0.15)  | 3.58 (0.17)  | 0.04 (-0.07, 0.16) <sup>c</sup>   | 0.451  |
|                                              | GSD       | 3.32 (0.09)              | 3.59 (0.11)  | 3.71 (0.13)  | 3.83 (0.15)  | 0.15 (0.04, 0.25) <sup>c</sup>    | 0.005  |
| HSQ high-intensity help-seeking <sup>b</sup> | PSD       | -                        | -            | -            | -            | 1.39 (0.84, 2.31) <sup>e</sup>    | 0.199  |
|                                              | GSD       | -                        | -            | -            | -            | 1.31 (0.84, 2.05) <sup>e</sup>    | 0.239  |
| HSQ low-intensity help-seeking <sup>b</sup>  | PSD       | -                        | -            | -            | -            | 1.23 (0.74, 2.06) <sup>e</sup>    | 0.422  |
|                                              | GSD       | -                        | -            | -            | -            | 1.33 (0.87, 2.04) <sup>e</sup>    | 0.189  |

Adjusted for participant age and gender

<sup>b</sup> G-SAS: Gambling Symptom Assessment Scale; K6: Kessler 6 Psychological Distress Scale; EUROHIS (first item); HSQ: Help-Seeking Questionnaire<sup>c</sup> Linear mixed regression models<sup>d</sup> Mixed effects ordered logistic regression models - estimates reported as ORs<sup>e</sup> Mixed effects logistic regression models - estimates reported as ORs

**Table S8.** Per-protocol between-group comparison of PSD and GSD conditions on primary and secondary outcomes after controlling for help-seeking <sup>a</sup>

| Outcome                                      | Unadjusted estimate (SE) |              |              |              | Estimated between-group difference (95% CI) | p     |
|----------------------------------------------|--------------------------|--------------|--------------|--------------|---------------------------------------------|-------|
|                                              | Baseline                 | 8-weeks      | 12-weeks     | 24-months    |                                             |       |
| G-SAS gambling symptom severity <sup>b</sup> | -                        | -0.32 (0.19) | -0.49 (0.29) | -3.89 (2.31) | -0.16 (-0.35, 0.03) <sup>c</sup>            | 0.092 |
| G-SAS gambling urges <sup>b</sup>            | -                        | -0.18 (0.07) | -0.27 (0.11) | -2.19 (0.84) | -0.09 (-0.16, -0.02) <sup>c</sup>           | 0.010 |
| Gambling frequency                           | -                        | -            | -            | -            | 0.95 (0.91, 1.00) <sup>d</sup>              | 0.046 |
| Gambling expenditure                         | -                        | -            | -            | -            | 0.99 (0.94, 1.04) <sup>d</sup>              | 0.702 |
| K6 psychological distress <sup>b</sup>       | -                        | -0.06 (0.10) | -0.08 (0.15) | -0.67 (1.18) | -0.03 (-0.12, 0.07) <sup>c</sup>            | 0.567 |
| EUROHIS quality of life <sup>b</sup>         | -                        | 0.02 (0.02)  | 0.03 (0.03)  | 0.26 (0.21)  | 0.01 (-0.01, 0.03) <sup>c</sup>             | 0.207 |

<sup>a</sup> Adjusted for participant age, gender, low- and high-intensity help-seeking (Help-Seeking Questionnaire)

<sup>b</sup> G-SAS: Gambling Symptom Assessment Scale; K6: Kessler 6 Psychological Distress Scale; EUROHIS (first item)

<sup>c</sup> Linear mixed regression models

<sup>d</sup> Mixed effects ordered logistic regression models - estimates reported as ORs (reference category = PSD)

**Table S9.** Per-protocol within-group change for PSD and GSD conditions in primary and secondary outcomes after controlling for help-seeking <sup>a</sup>

| Outcome                                      | Treatment | Unadjusted estimate (SE) |              |              |              | Estimated within-group            | p      |
|----------------------------------------------|-----------|--------------------------|--------------|--------------|--------------|-----------------------------------|--------|
|                                              | group     | Baseline                 | 8-weeks      | 12-weeks     | 24-months    | difference (95% CI)               |        |
| G-SAS gambling symptom severity <sup>b</sup> | PSD       | 29.71 (1.37)             | 22.10 (1.33) | 18.75 (1.60) | 18.40 (1.85) | -4.11 (-5.37, -2.85) <sup>c</sup> | <0.001 |
|                                              | GSD       | 28.09 (1.31)             | 19.42 (1.20) | 15.59 (1.47) | 14.03 (1.73) | -4.68 (-5.94, -3.42) <sup>c</sup> | <0.001 |
| G-SAS gambling urges <sup>b</sup>            | PSD       | 10.03 (0.52)             | 7.60 (0.50)  | 6.54 (0.61)  | 6.50 (0.66)  | -1.31 (-1.79, -0.83) <sup>c</sup> | <0.001 |
|                                              | GSD       | 9.15 (0.47)              | 6.63 (0.42)  | 5.52 (0.52)  | 4.01 (0.65)  | -1.35 (-1.80, -0.90) <sup>c</sup> | <0.001 |
| Gambling frequency                           | PSD       | -                        | -            | -            | -            | 0.67 (0.49, 0.94) <sup>d</sup>    | 0.019  |
|                                              | GSD       | -                        | -            | -            | -            | 0.36 (0.25, 0.53) <sup>d</sup>    | <0.001 |
| Gambling expenditure                         | PSD       | -                        | -            | -            | -            | 0.36 (0.23, 0.56) <sup>d</sup>    | <0.001 |
|                                              | GSD       | -                        | -            | -            | -            | 0.38 (0.26, 0.55) <sup>d</sup>    | <0.001 |
| K6 psychological distress <sup>b</sup>       | PSD       | 16.55 (0.77)             | 14.39 (0.75) | 13.43 (0.86) | 12.34 (0.91) | -1.16 (-1.74, -0.58) <sup>c</sup> | <0.001 |
|                                              | GSD       | 17.28 (0.76)             | 13.80 (0.70) | 12.28 (0.84) | 12.25 (0.94) | -1.88 (-2.57, -1.18) <sup>c</sup> | <0.001 |
| EUROHIS quality of life <sup>b</sup>         | PSD       | 3.34 (0.15)              | 3.44 (0.14)  | 3.49 (0.17)  | 3.55 (0.18)  | 0.05 (-0.07, 0.17) <sup>c</sup>   | 0.374  |
|                                              | GSD       | 3.35 (0.13)              | 3.61 (0.12)  | 3.73 (0.14)  | 3.85 (0.16)  | 0.14 (0.03, 0.25) <sup>c</sup>    | 0.015  |

<sup>a</sup> Adjusted for participant age, gender, low- and high-intensity help-seeking (Help-Seeking Questionnaire)<sup>b</sup> G-SAS: Gambling Symptom Assessment Scale; K6: Kessler 6 Psychological Distress Scale; EUROHIS (first item)<sup>c</sup> Linear mixed regression models<sup>d</sup> Mixed effects ordered logistic regression models - estimates reported as ORs

**Table S10.** Estimated effect of GSD intervention (vs PSD intervention) from per-protocol, multiple imputation under MAR, multiple imputation under LMCF, multiple imputation under J2R, and multiple imputation under CIR

| Analysis          | 8-weeks                    |       | 12-weeks                   |       | 24-months                  |       |
|-------------------|----------------------------|-------|----------------------------|-------|----------------------------|-------|
|                   | Estimate (SE) <sup>a</sup> | p     | Estimate (SE) <sup>a</sup> | p     | Estimate (SE) <sup>a</sup> | p     |
| Per-protocol      | 1.46 (2.82)                | 0.606 | -2.60 (2.75)               | 0.359 | -1.61 (3.14)               | 0.614 |
| MAR <sup>b</sup>  | 2.44 (1.94)                | 0.216 | -2.68 (3.11)               | 0.416 | -1.63 (2.42)               | 0.516 |
| LMCF <sup>b</sup> | 2.44 (1.93)                | 0.214 | 0.39 (3.00)                | 0.899 | 0.42 (2.05)                | 0.839 |
| J2R <sup>c</sup>  | 1.77 (1.74)                | 0.310 | 0.11 (2.18)                | 0.962 | 0.65 (1.78)                | 0.718 |
| CIR <sup>d</sup>  | 1.77 (1.74)                | 0.310 | 0.19 (2.23)                | 0.932 | 0.24 (1.72)                | 0.889 |

<sup>a</sup>Linear mixed regression models<sup>b</sup>MAR: randomised-arm missing at random; LMCF: last mean carried forward; J2R: jump to reference; CIR: copy increments in reference

**Table S11.** Exploratory univariate and multivariate logistic regression models of factors associated with clinically significant change on G-SAS gambling symptom severity at 8- or 12- week evaluation

| Variable                                       | Univariate model |              |       | Multivariate model <sup>a</sup> |              |       |
|------------------------------------------------|------------------|--------------|-------|---------------------------------|--------------|-------|
|                                                | OR               | 95% CI       | p     | OR                              | 95% CI       | p     |
| Sex                                            |                  |              |       |                                 |              |       |
| Female (referent)                              | 1.00             | -            | -     | 1.00                            | -            | -     |
| Male                                           | 0.43             | 0.16 - 1.14  | 0.091 | 1.77                            | 0.26 – 12.1  | 0.560 |
| Age <sup>b</sup>                               | 1.11             | 0.90 - 1.37  | 0.333 |                                 |              |       |
| Country of birth                               |                  |              |       |                                 |              |       |
| Australia (referent)                           | 1.00             | -            | -     |                                 |              |       |
| Other                                          | 0.77             | 0.26 - 2.29  | 0.634 |                                 |              |       |
| Employment                                     |                  |              |       |                                 |              |       |
| Unemployed/student (referent)                  | 1.00             | -            | -     |                                 |              |       |
| Employed full-time/part-time/casual            | 0.40             | 0.08 - 2.02  | 0.266 |                                 |              |       |
| Annual personal net income                     |                  |              |       |                                 |              |       |
| < AUD\$40,000 (referent)                       | 1.00             | -            | -     | 1.00                            | -            | -     |
| AUD\$40,000 - \$79,999                         | 0.33             | 0.10 - 1.08  | 0.067 | 0.30                            | 0.08 – 1.18  | 0.086 |
| AUD\$80,000+                                   | 0.63             | 0.16 - 2.41  | 0.500 | 0.92                            | 0.19 – 4.43  | 0.915 |
| Internet use (hours) <sup>c</sup>              | 0.90             | 0.72 - 1.12  | 0.349 |                                 |              |       |
| Problematic gambling activities                |                  |              |       |                                 |              |       |
| No EGMs (referent)                             | 1.00             | -            | -     | 1.00                            | -            | -     |
| EGMs only                                      | 5.50             | 1.61 - 18.84 | 0.007 | 12.83                           | 1.69 – 97.49 | 0.014 |
| EGMs + others                                  | 1.88             | 0.57 - 6.21  | 0.304 | 2.48                            | 0.66 – 9.35  | 0.179 |
| PGSI problem gambling severity <sup>d</sup>    | 1.00             | 0.92 - 1.09  | 0.912 |                                 |              |       |
| Gambling frequency (days) <sup>e</sup>         | 1.00             | 0.98 - 1.03  | 0.778 |                                 |              |       |
| Gambling expenditure (\$) <sup>e</sup>         |                  |              |       |                                 |              |       |
| AUD\$0 (referent)                              | 1.00             | -            | -     |                                 |              |       |
| AUD\$1 - \$200                                 | 0.67             | 0.04 - 11.29 | 0.779 |                                 |              |       |
| AUD\$201 - \$800                               | 4.89             | 0.68 - 34.96 | 0.114 |                                 |              |       |
| AUD\$801+                                      | 2.40             | 0.49 - 11.81 | 0.282 |                                 |              |       |
| K6 psychological distress <sup>d</sup>         | 1.08             | 0.99 - 1.17  | 0.080 | 1.06                            | 0.97 – 1.17  | 0.206 |
| EUROHIS quality of life <sup>d,f</sup>         | 1.07             | 0.70 - 1.62  | 0.759 |                                 |              |       |
| AUDIT-3 hazardous alcohol use <sup>d</sup>     | 1.13             | 0.79 - 1.61  | 0.509 |                                 |              |       |
| Substance use frequency <sup>e</sup>           | 1.03             | 0.89 – 1.20  | 0.679 |                                 |              |       |
| Readiness rulers                               |                  |              |       |                                 |              |       |
| Willing                                        | 1.81             | 1.01 - 3.27  | 0.047 | 1.79                            | 1.01, 3.17   | 0.046 |
| Ready                                          | 1.38             | 0.92 - 2.06  | 0.117 |                                 |              |       |
| Able                                           | 1.13             | 0.94 - 1.35  | 0.190 |                                 |              |       |
| BSCQ self-efficacy <sup>d</sup>                | 1.00             | 0.98 - 1.03  | 0.782 |                                 |              |       |
| Treatment goal                                 |                  |              |       |                                 |              |       |
| Quit altogether (referent)                     | 1.00             | -            | -     |                                 |              |       |
| Quit problem gambling activities               | 0.57             | 0.20 - 1.67  | 0.305 |                                 |              |       |
| Cut back problem gambling activities           | 0.51             | 0.16 - 1.63  | 0.256 |                                 |              |       |
| HSQ high-intensity help-seeking <sup>d,e</sup> |                  |              |       |                                 |              |       |
| No (referent)                                  | 1.00             | -            | -     |                                 |              |       |
| Yes                                            | 2.60             | 0.77 - 8.78  | 0.123 |                                 |              |       |
| HSQ low-intensity help-seeking <sup>d,e</sup>  |                  |              |       |                                 |              |       |
| No (referent)                                  | 1.00             | -            | -     |                                 |              |       |
| Yes                                            | 3.29             | 0.67 - 16.21 | 0.143 |                                 |              |       |
| HSQ self-directed actions <sup>d,e</sup>       |                  |              |       |                                 |              |       |
| No (referent)                                  | 1.00             | -            | -     |                                 |              |       |
| Yes                                            | 1.57             | 0.62 - 3.96  | 0.337 |                                 |              |       |
| Treatment engagement <sup>g</sup>              | 1.02             | 0.98 - 1.06  | 0.338 |                                 |              |       |

<sup>a</sup> Variable selection based on  $p < 0.10$  from univariable analyses<sup>b</sup> Age groups in continuous form<sup>c</sup> Based on average weekly use for work/personal/education/recreation<sup>d</sup> PGSI: Problem Gambling Severity Index; K6: Kessler 6 Psychological Distress Scale; EUROHIS (first item); AUDIT-3: Alcohol Use Disorders Identification Test-3; BSCQ: Brief Situational Confidence Questionnaire (adapted to gambling); HSQ: Help-Seeking Questionnaire<sup>e</sup> Based on previous 30 days<sup>f</sup> First item only<sup>g</sup> Treatment engagement defined as completing at least one module activity

**Table S12.** Exploratory univariate and multivariate logistic regression models of factors associated with clinically significant change on G-SAS gambling symptom severity at 24-month evaluation

| Variable                                       | Univariate model |             |       | Multivariate model <sup>a</sup> |             |       |
|------------------------------------------------|------------------|-------------|-------|---------------------------------|-------------|-------|
|                                                | OR               | 95% CI      | p     | OR                              | 95% CI      | p     |
| Sex                                            |                  |             |       |                                 |             |       |
| Female (referent)                              | 1.00             | -           | -     | 1.00                            | -           | -     |
| Male                                           | 0.27             | 0.07 – 1.09 | 0.065 | 0.19                            | 0.04 – 0.85 | 0.030 |
| Age <sup>b</sup>                               | 0.98             | 0.75 – 1.26 | 0.859 |                                 |             |       |
| Country of birth                               |                  |             |       |                                 |             |       |
| Australia (referent)                           | 1.00             | -           | -     |                                 |             |       |
| Other                                          | 1.67             | 0.40 – 6.97 | 0.484 |                                 |             |       |
| Employment                                     |                  |             |       |                                 |             |       |
| Unemployed/student (referent)                  | 1.00             | -           | -     |                                 |             |       |
| Employed full-time/part-time/casual            | 1.80             | 0.36 – 9.04 | 0.475 |                                 |             |       |
| Annual personal net income                     |                  |             |       |                                 |             |       |
| < AUD\$40,000 (referent)                       | 1.00             | -           | -     |                                 |             |       |
| AUD\$40,000 - \$79,999                         | 0.96             | 0.21 – 4.45 | 0.957 |                                 |             |       |
| AUD\$80,000+                                   | 0.38             | 0.07 – 1.99 | 0.253 |                                 |             |       |
| Internet use (hours) <sup>c</sup>              | 1.45             | 1.05 – 2.01 | 0.025 | 1.59                            | 1.09 – 2.30 | 0.015 |
| Problematic gambling activities                |                  |             |       |                                 |             |       |
| No EGMs (referent)                             | 1.00             | -           | -     |                                 |             |       |
| EGMs only                                      | 2.92             | 0.65 –      | 0.160 |                                 |             |       |
| EGMs + others                                  | 1.55             | 0.34 – 6.94 | 0.568 |                                 |             |       |
| PGSI problem gambling severity <sup>d</sup>    | 1.00             | 0.91 – 1.09 | 0.978 |                                 |             |       |
| Gambling frequency (days) <sup>e</sup>         | 1.00             | 0.97 – 1.03 | 0.839 |                                 |             |       |
| Gambling expenditure (\$) <sup>e</sup>         |                  |             |       |                                 |             |       |
| AUD\$0 (referent)                              | 1.00             | -           | -     |                                 |             |       |
| AUD\$1 - \$200                                 | 1.00             | -           | -     |                                 |             |       |
| AUD\$201 - \$800                               | 0.38             | 0.02 – 6.35 | 0.497 |                                 |             |       |
| AUD\$801+                                      | 0.53             | 0.05 – 5.19 | 0.588 |                                 |             |       |
| K6 psychological distress <sup>d</sup>         | 1.07             | 0.97 – 1.17 | 0.172 |                                 |             |       |
| EUROHIS quality of life <sup>d,f</sup>         | 1.10             | 0.66 – 1.82 | 0.717 |                                 |             |       |
| AUDIT-3 hazardous alcohol use <sup>d</sup>     | 0.72             | 0.46 – 1.13 | 0.148 |                                 |             |       |
| Substance use frequency <sup>e</sup>           | 1.07             | 0.87 – 1.32 | 0.517 |                                 |             |       |
| Readiness rulers                               |                  |             |       |                                 |             |       |
| Willing                                        | 0.75             | 0.43 – 1.29 | 0.298 |                                 |             |       |
| Ready                                          | 0.98             | 0.76 – 1.25 | 0.852 |                                 |             |       |
| Able                                           | 1.05             | 0.84 – 1.32 | 0.673 |                                 |             |       |
| BSCQ self-efficacy <sup>d</sup>                | 1.00             | 0.97 – 1.02 | 0.753 |                                 |             |       |
| Treatment goal                                 |                  |             |       |                                 |             |       |
| Quit altogether (referent)                     | 1.00             | -           | -     |                                 |             |       |
| Quit problem gambling activities               | 2.65             | 0.61 – 11.4 | 0.192 |                                 |             |       |
| Cut back problem gambling activities           | 1.38             | 0.34 – 5.56 | 0.655 |                                 |             |       |
| HSQ high-intensity help-seeking <sup>d,e</sup> |                  |             |       |                                 |             |       |
| No (referent)                                  | 1.00             | -           | -     |                                 |             |       |
| Yes                                            | 1.02             | 0.27 – 3.87 | 0.981 |                                 |             |       |
| HSQ low-intensity help-seeking <sup>d,e</sup>  |                  |             |       |                                 |             |       |
| No (referent)                                  | 1.00             | -           | -     |                                 |             |       |
| Yes                                            | 1.14             | 0.20 – 6.53 | 0.881 |                                 |             |       |
| HSQ self-directed actions <sup>d,e</sup>       |                  |             |       |                                 |             |       |
| No (referent)                                  | 1.00             | -           | -     |                                 |             |       |
| Yes                                            | 1.13             | 0.37 – 3.46 | 0.829 |                                 |             |       |
| Treatment engagement <sup>g</sup>              | 1.04             | 0.97 – 1.11 | 0.251 |                                 |             |       |

<sup>a</sup> Variable selection based on  $p < 0.10$  from univariable analyses<sup>b</sup> Age groups in continuous form<sup>c</sup> Based on average weekly use for work/personal/education/recreation<sup>d</sup> PGSI: Problem Gambling Severity Index; K6: Kessler 6 Psychological Distress Scale; EUROHIS (first item); AUDIT-3: Alcohol Use Disorders Identification Test-3; BSCQ: Brief Situational Confidence Questionnaire (adapted to gambling); HSQ: Help-Seeking Questionnaire<sup>e</sup> Based on previous 30 days<sup>f</sup> First item only<sup>g</sup> Treatment engagement defined as completing at least one module activity

**Table S13.** Exploratory univariate and multivariate logistic regression models of factors associated with module activity completion

| Variable                                       | Univariate model |             |       | Multivariate model <sup>a</sup> |             |       |
|------------------------------------------------|------------------|-------------|-------|---------------------------------|-------------|-------|
|                                                | OR               | 95% CI      | p     | OR                              | 95% CI      | p     |
| Sex                                            |                  |             |       |                                 |             |       |
| Female (referent)                              | 1.00             | -           | -     |                                 |             |       |
| Male                                           | 0.63             | 0.35 – 1.15 | 0.130 |                                 |             |       |
| Age <sup>b</sup>                               | 1.24             | 1.09 – 1.41 | 0.001 | 1.28                            | 1.11 – 1.47 | 0.001 |
| Country of birth                               |                  |             |       |                                 |             |       |
| Australia (referent)                           | 1.00             | -           | -     |                                 |             |       |
| Other                                          | 0.76             | 0.38 – 1.54 | 0.450 |                                 |             |       |
| Employment                                     |                  |             |       |                                 |             |       |
| Unemployed/student (referent)                  | 1.00             | -           | -     |                                 |             |       |
| Employed full-time/part-time/casual            | 1.55             | 0.59 – 4.10 | 0.378 |                                 |             |       |
| Annual personal net income                     |                  |             |       |                                 |             |       |
| < AUD\$40,000 (referent)                       | 1.00             | -           | -     |                                 |             |       |
| AUD\$40,000 - \$79,999                         | 1.20             | 0.60 – 2.41 | 0.611 |                                 |             |       |
| AUD\$80,000+                                   | 1.01             | 0.43 – 2.37 | 0.983 |                                 |             |       |
| Internet use (hours) <sup>c</sup>              | 1.20             | 1.04 – 1.39 | 0.013 | 1.29                            | 1.10 – 1.52 | 0.002 |
| Problematic gambling activities                |                  |             |       |                                 |             |       |
| No EGMs (referent)                             | 1.00             | -           | -     |                                 |             |       |
| EGMs only                                      | 1.82             | 0.86 – 3.85 | 0.116 |                                 |             |       |
| EGMs + others                                  | 1.19             | 0.53 – 2.65 | 0.678 |                                 |             |       |
| PGSI problem gambling severity <sup>d</sup>    | 0.96             | 0.91 – 1.01 | 0.151 |                                 |             |       |
| G-SAS gambling symptom severity <sup>d</sup>   | 0.99             | 0.95 – 1.03 | 0.532 |                                 |             |       |
| G-SAS gambling urges <sup>d</sup>              | 0.95             | 0.85 – 1.05 | 0.296 |                                 |             |       |
| Gambling frequency (days) <sup>e</sup>         | 0.99             | 0.97 – 1.01 | 0.426 |                                 |             |       |
| Gambling expenditure (\$) <sup>e</sup>         |                  |             |       |                                 |             |       |
| AUD\$0 (referent)                              | 1.00             | -           | -     |                                 |             |       |
| AUD\$1 - \$200                                 | 0.83             | 0.19 – 3.58 | 0.806 |                                 |             |       |
| AUD\$201 - \$800                               | 2.34             | 0.75 – 7.37 | 0.145 |                                 |             |       |
| AUD\$801+                                      | 0.75             | 0.30 – 1.91 | 0.552 |                                 |             |       |
| K6 psychological distress <sup>d</sup>         | 0.98             | 0.93 – 1.03 | 0.353 |                                 |             |       |
| EUROHIS quality of life <sup>d,f</sup>         | 1.21             | 0.90 – 1.62 | 0.200 |                                 |             |       |
| AUDIT-3 hazardous alcohol use <sup>d</sup>     | 0.83             | 0.65 – 1.06 | 0.145 |                                 |             |       |
| Substance use frequency <sup>e</sup>           | 0.92             | 0.83 – 1.02 | 0.124 |                                 |             |       |
| Readiness rulers                               |                  |             |       |                                 |             |       |
| Willing                                        | 0.96             | 0.75 – 1.22 | 0.737 |                                 |             |       |
| Ready                                          | 1.05             | 0.87 – 1.26 | 0.622 |                                 |             |       |
| Able                                           | 1.01             | 0.90 – 1.13 | 0.929 |                                 |             |       |
| BSCQ self-efficacy <sup>d</sup>                | 1.01             | 1.00 – 1.03 | 0.089 | 1.02                            | 0.00 – 1.03 | 0.031 |
| Treatment goal                                 |                  |             |       |                                 |             |       |
| Quit altogether (referent)                     | 1.00             | -           | -     |                                 |             |       |
| Quit problem gambling activities               | 1.67             | 0.83 – 3.36 | 0.151 |                                 |             |       |
| Cut back problem gambling activities           | 0.71             | 0.34 - 1.48 | 0.359 |                                 |             |       |
| HSQ high-intensity help-seeking <sup>d,e</sup> |                  |             |       |                                 |             |       |
| No (referent)                                  | 1.00             | -           | -     |                                 |             |       |
| Yes                                            | 1.26             | 0.58 – 2.77 | 0.557 |                                 |             |       |
| HSQ low-intensity help-seeking <sup>d,e</sup>  |                  |             |       |                                 |             |       |
| No (referent)                                  | 1.00             | -           | -     |                                 |             |       |
| Yes                                            | 0.94             | 0.36 – 2.43 | 0.900 |                                 |             |       |
| HSQ self-directed actions <sup>d,e</sup>       |                  |             |       |                                 |             |       |
| No (referent)                                  | 1.00             | -           | -     | 1.00                            | -           | -     |
| Yes                                            | 2.68             | 1.47 – 4.87 | 0.001 | 2.93                            | 1.54 – 5.60 | 0.001 |

<sup>a</sup> Variable selection based on  $p < 0.10$  from univariable analyses<sup>b</sup> Age groups in continuous form<sup>c</sup> Based on average weekly use for work/personal/education/recreation<sup>d</sup> PGSI: Problem Gambling Severity Index; G-SAS: Gambling Symptom Assessment Scale; K6: Kessler 6 Psychological Distress Scale; EUROHIS (first item); AUDIT-3: Alcohol Use Disorders Identification Test-3; BSCQ: Brief Situational Confidence Questionnaire (adapted to gambling); HSQ: Help-Seeking Questionnaire<sup>e</sup> Based on previous 30 days<sup>f</sup> First item only

**Table S14.** Exploratory univariate and multivariate logistic regression models of factors associated with post-baseline evaluation completion

| Variable                                       | Univariate model |             |       | Multivariate model <sup>a</sup> |              |       |
|------------------------------------------------|------------------|-------------|-------|---------------------------------|--------------|-------|
|                                                | OR               | 95% CI      | p     | OR                              | 95% CI       | p     |
| Sex                                            |                  |             |       |                                 |              |       |
| Female (referent)                              | 1.00             | -           | -     |                                 |              |       |
| Male                                           | 1.07             | 0.60 – 1.89 | 0.818 |                                 |              |       |
| Age <sup>b</sup>                               | 1.10             | 0.98 – 1.24 | 0.103 |                                 |              |       |
| Country of birth                               |                  |             |       |                                 |              |       |
| Australia (referent)                           | 1.00             | -           | -     |                                 |              |       |
| Other                                          | 0.65             | 0.34 – 1.24 | 0.189 |                                 |              |       |
| Employment                                     |                  |             |       |                                 |              |       |
| Unemployed/student (referent)                  | 1.00             | -           | -     |                                 |              |       |
| Employed full-time/part-time/casual            | 0.79             | 0.34 – 1.86 | 0.593 |                                 |              |       |
| Annual personal net income                     |                  |             |       |                                 |              |       |
| < AUD\$40,000 (referent)                       | 1.00             | -           | -     |                                 |              |       |
| AUD\$40,000 - \$79,999                         | 0.74             | 0.38 – 1.42 | 0.365 |                                 |              |       |
| AUD\$80,000+                                   | 1.45             | 0.65 – 3.21 | 0.364 |                                 |              |       |
| Internet use (hours) <sup>c</sup>              | 1.13             | 0.98 – 1.30 | 0.087 | 1.11                            | 0.95 – 1.29  | 0.199 |
| Problematic gambling activities                |                  |             |       |                                 |              |       |
| No EGMs (referent)                             | 1.00             | -           | -     |                                 |              |       |
| EGMs only                                      | 0.92             | 0.46 – 1.82 | 0.809 |                                 |              |       |
| EGMs + others                                  | 0.88             | 0.43 – 1.81 | 0.729 |                                 |              |       |
| PGSI problem gambling severity <sup>d</sup>    | 1.01             | 0.96 – 1.07 | 0.632 |                                 |              |       |
| G-SAS gambling symptom severity <sup>d</sup>   | 0.98             | 0.94 – 1.01 | 0.227 |                                 |              |       |
| G-SAS gambling urges <sup>d</sup>              | 0.90             | 0.81 – 0.99 | 0.034 | 0.90                            | 0.80 – 1.00  | 0.047 |
| Gambling frequency (days) <sup>e</sup>         | 1.00             | 0.99 – 1.02 | 0.619 |                                 |              |       |
| Gambling expenditure (\$) <sup>e</sup>         |                  |             |       |                                 |              |       |
| AUD\$0 (referent)                              | 1.00             | -           | -     | 1.00                            | -            | -     |
| AUD\$1 - \$200                                 | 0.83             | 0.19 – 3.58 | 0.806 | 1.17                            | 0.24 – 5.66  | 0.845 |
| AUD\$201 - \$800                               | 3.19             | 1.00 –      | 0.050 | 3.64                            | 1.00 – 13.27 | 0.051 |
| AUD\$801+                                      | 1.90             | 0.76 – 4.76 | 0.170 | 2.78                            | 0.97 – 7.98  | 0.058 |
| K6 psychological distress <sup>d</sup>         | 0.99             | 0.94 – 1.04 | 0.634 |                                 |              |       |
| EUROHIS quality of life <sup>d,f</sup>         | 0.99             | 0.76 – 1.30 | 0.965 |                                 |              |       |
| AUDIT-3 hazardous alcohol use <sup>d</sup>     | 0.90             | 0.72 – 1.13 | 0.378 |                                 |              |       |
| Substance use frequency <sup>e</sup>           | 0.96             | 0.90 – 1.02 | 0.198 |                                 |              |       |
| Readiness rulers                               |                  |             |       |                                 |              |       |
| Willing                                        | 1.01             | 0.80 – 1.27 | 0.951 |                                 |              |       |
| Ready                                          | 0.87             | 0.73 – 1.04 | 0.121 |                                 |              |       |
| Able                                           | 1.00             | 0.90 – 1.11 | 0.996 |                                 |              |       |
| BSCQ self-efficacy <sup>d</sup>                | 1.01             | 0.99 – 1.02 | 0.255 |                                 |              |       |
| Treatment goal                                 |                  |             |       |                                 |              |       |
| Quit altogether (referent)                     | 1.00             | -           | -     |                                 |              |       |
| Quit problem gambling activities               | 1.23             | 0.57 – 2.23 | 0.729 |                                 |              |       |
| Cut back problem gambling activities           | 0.67             | 0.35 – 1.30 | 0.235 |                                 |              |       |
| HSQ high-intensity help-seeking <sup>d,e</sup> |                  |             |       |                                 |              |       |
| No (referent)                                  | 1.00             | -           | -     | 1.00                            | -            | -     |
| Yes                                            | 2.65             | 1.18 – 5.92 | 0.018 | 2.93                            | 1.23 – 6.97  | 0.015 |
| HSQ low-intensity help-seeking <sup>d,e</sup>  |                  |             |       |                                 |              |       |
| No (referent)                                  | 1.00             | -           | -     |                                 |              |       |
| Yes                                            | 1.58             | 0.64 – 3.87 | 0.321 |                                 |              |       |
| HSQ self-directed actions <sup>d,e</sup>       |                  |             |       |                                 |              |       |
| No (referent)                                  | 1.00             | -           | -     |                                 |              |       |
| Yes                                            | 1.53             | 0.88 – 2.65 | 0.129 |                                 |              |       |
| Treatment engagement <sup>g</sup>              | 1.07             | 1.02 – 1.12 | 0.003 | 1.06                            | 1.01 – 1.11  | 0.010 |

<sup>a</sup> Variable selection based on  $p < 0.10$  from univariable analyses<sup>b</sup> Age groups in continuous form<sup>c</sup> Based on average weekly use for work/personal/education/recreation<sup>d</sup> PGSI: Problem Gambling Severity Index; G-SAS: Gambling Symptom Assessment Scale; K6: Kessler 6 Psychological Distress Scale; EUROHIS (first item); AUDIT-3: Alcohol Use Disorders Identification Test-3; BSCQ: Brief Situational Confidence Questionnaire (adapted to gambling); HSQ: Help-Seeking Questionnaire<sup>e</sup> Based on previous 30 days<sup>f</sup> First item only<sup>g</sup> Treatment engagement defined as completing at least one module activity
